# Supplementary material for: An efficient behavioral screening platform classifies natural products and other chemical cues according to their chemosensory valence in C. elegans
Source: PubMed Central journal article supplement — bioRxiv. 2024 Apr 3:2023.06.02.542933. Preprint. [Version 3] doi: 10.1101/2023.06.02.542933 (PMC10274637; doi:10.1101/2023.06.02.542933), 2024-04-03
Supplement: media-1.pdf [file media-1.pdf]

# Figure S1

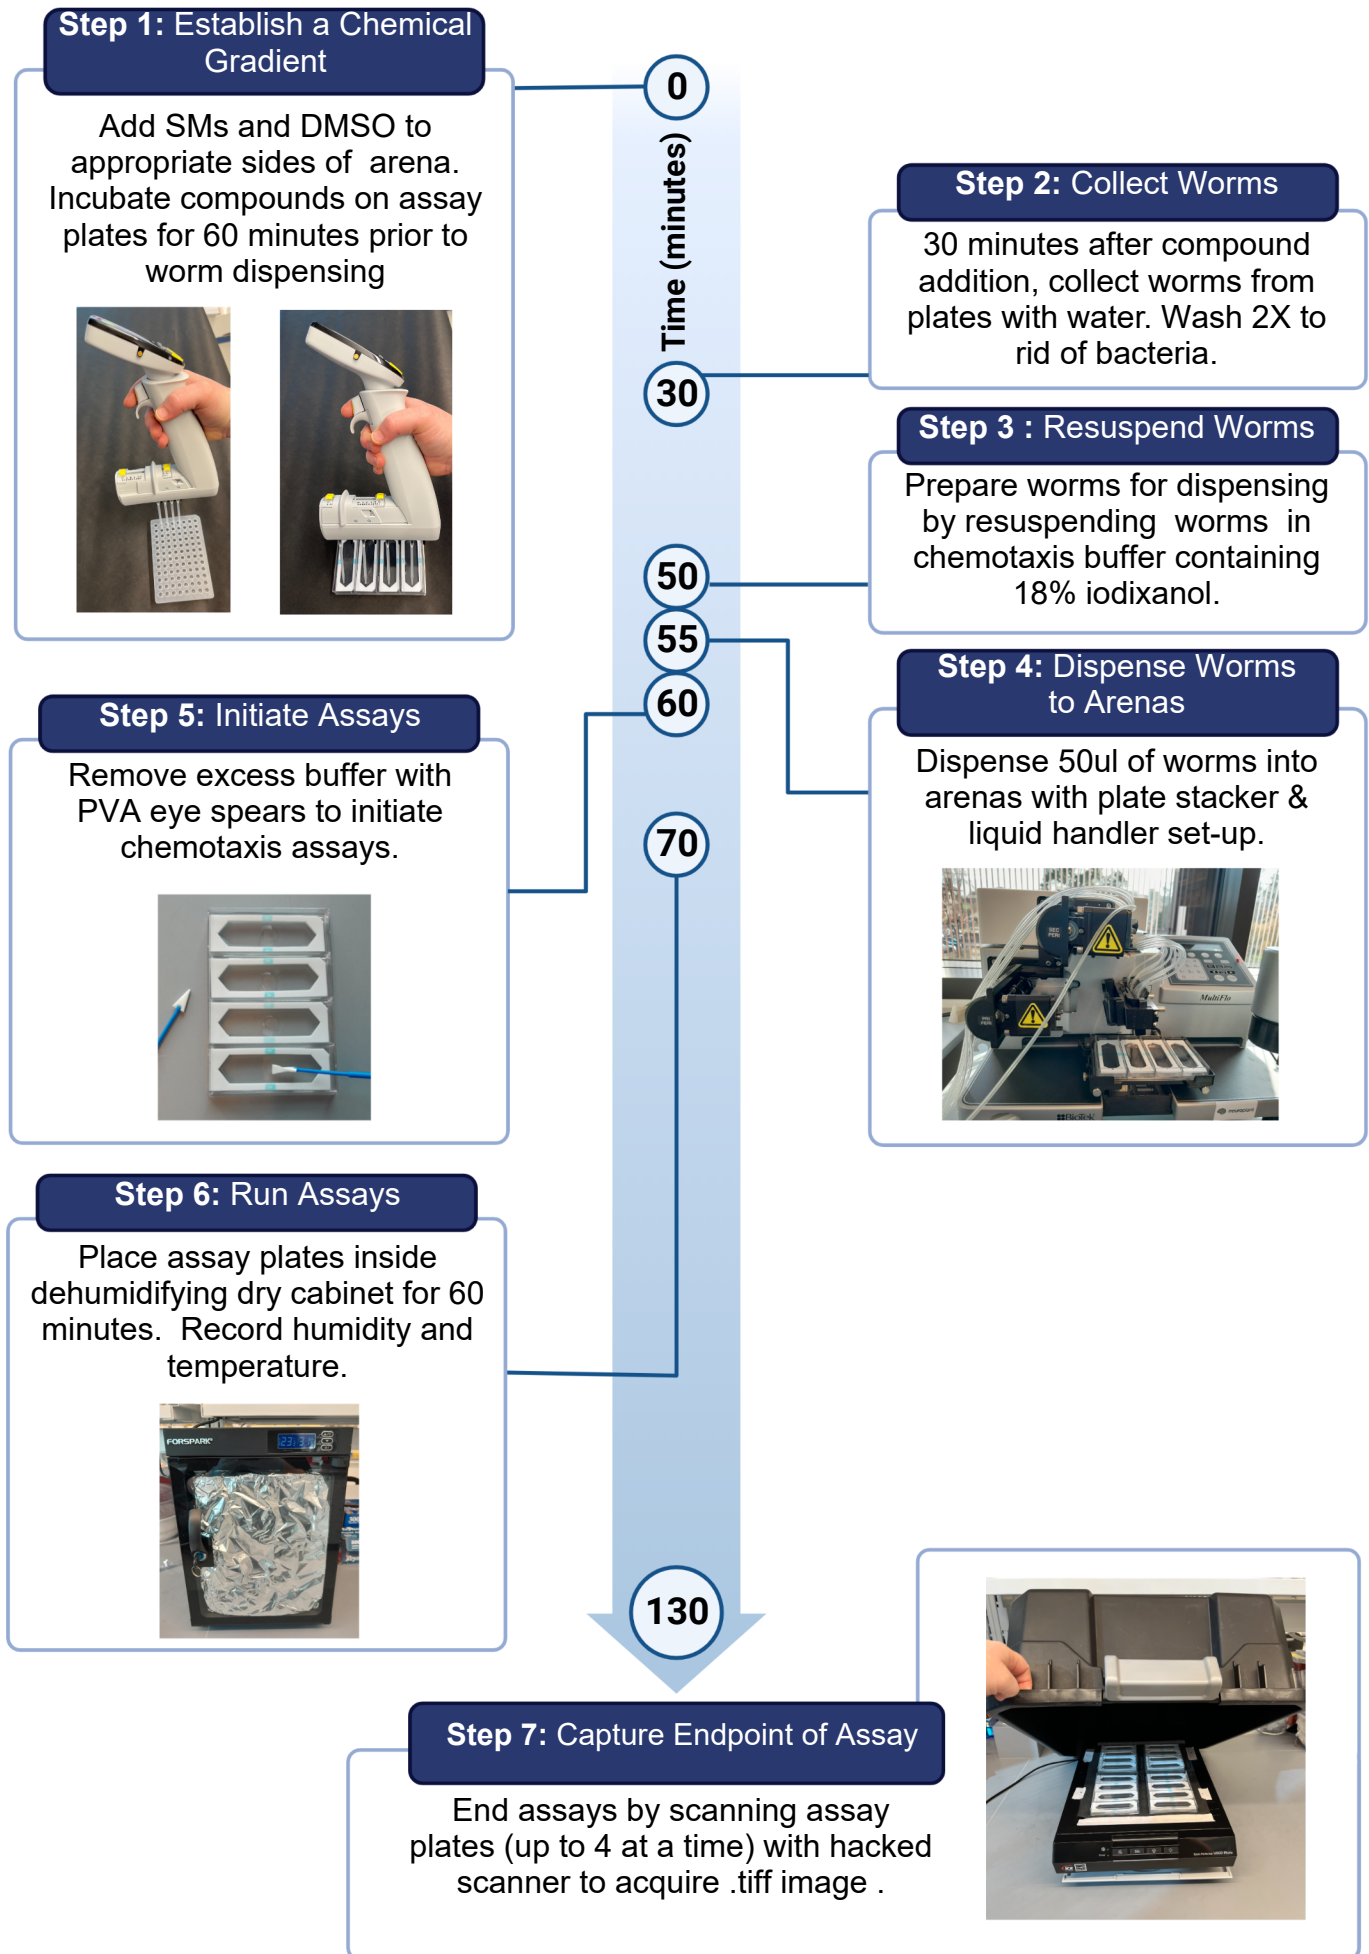

Figure S2

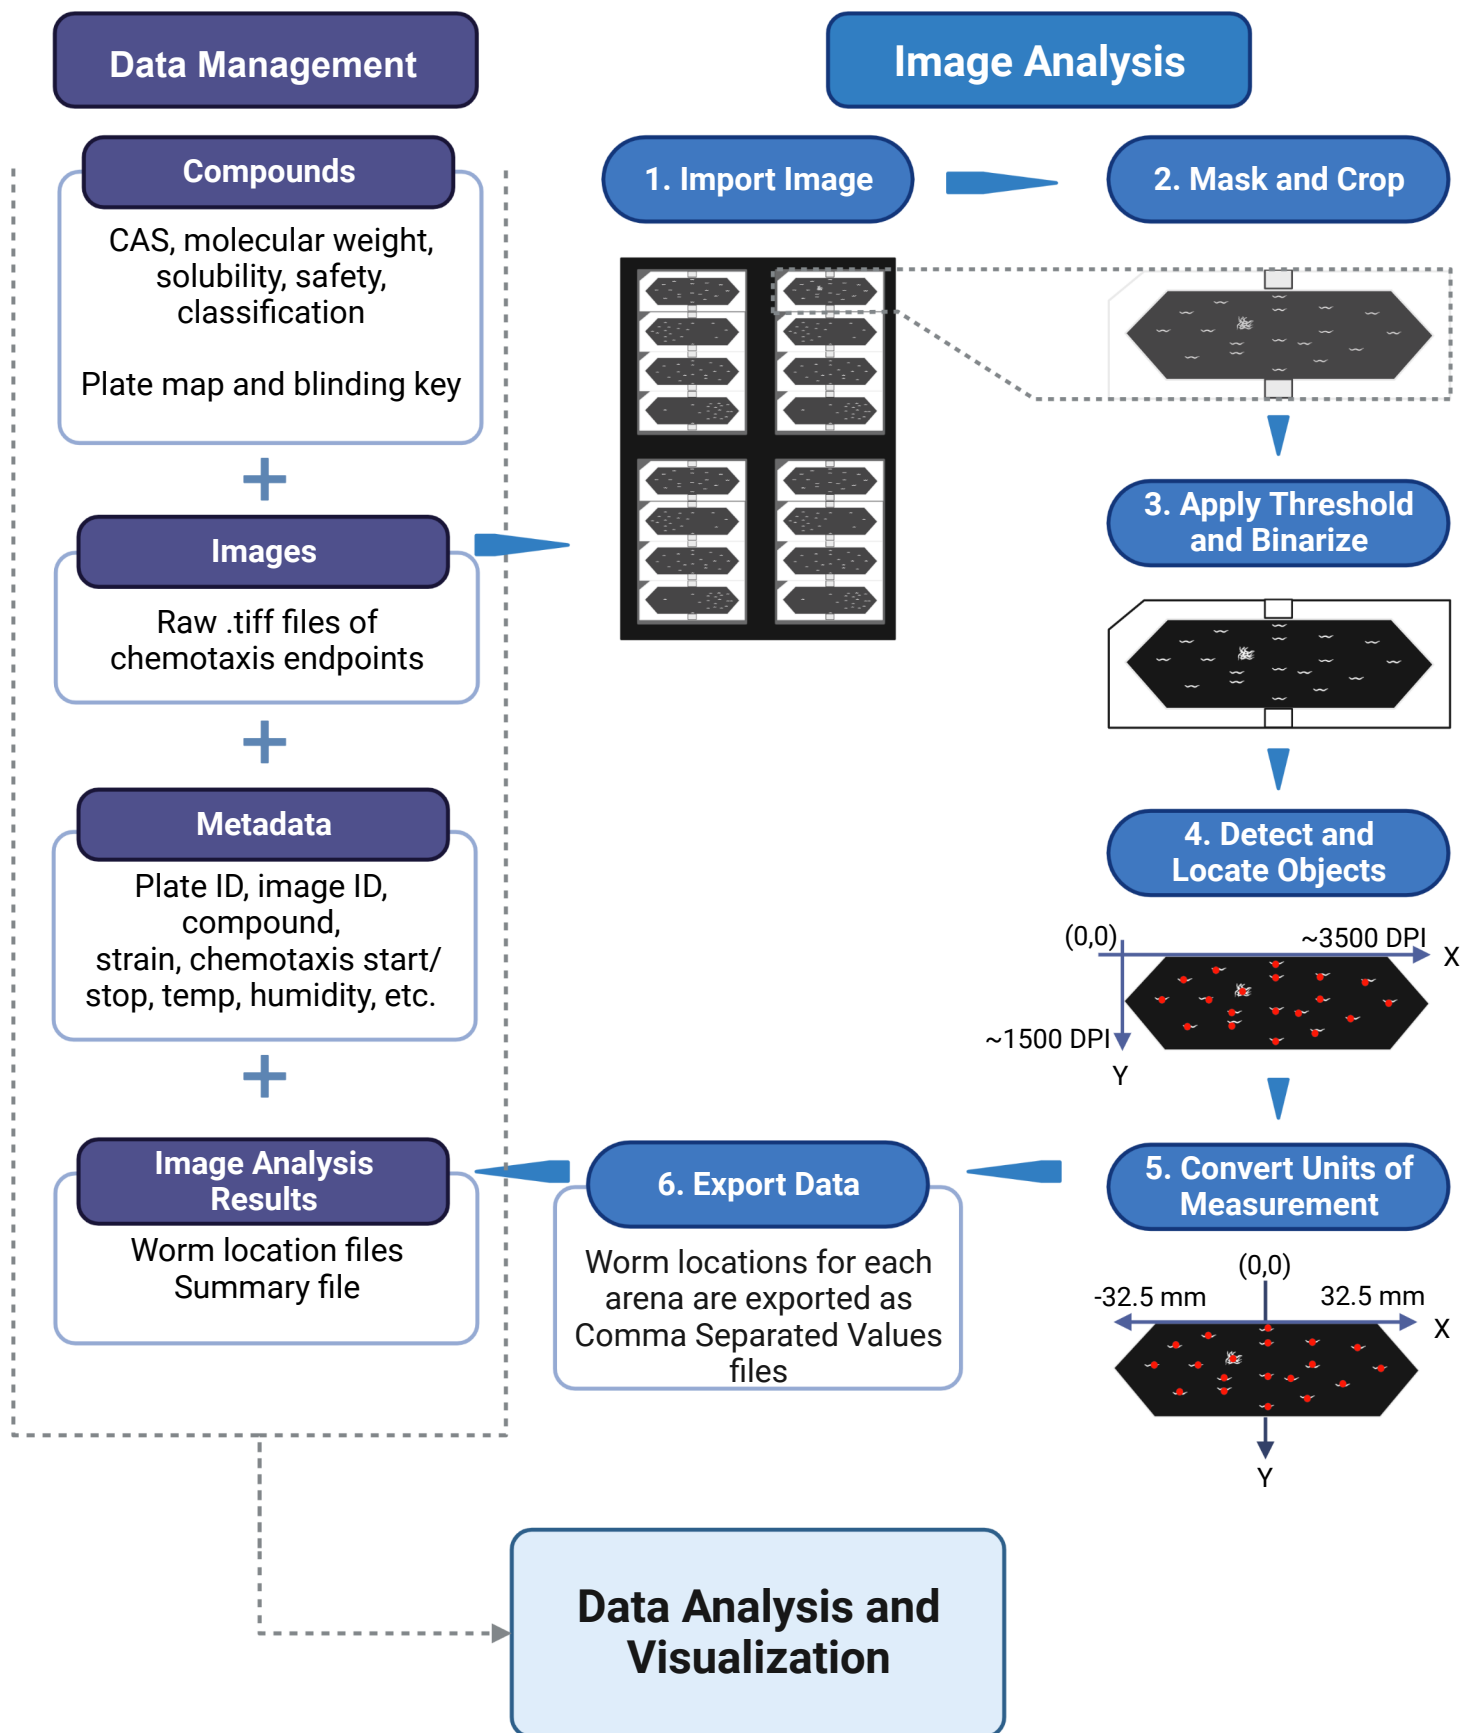

| CAS No.     | Compound                 | Vendor    | Catalogue # |
|-------------|--------------------------|-----------|-------------|
| 0431-03-08  | Diacetyl                 | TCI       | B0682       |
| 0483-04-5   | Ajmalicine               | Cayman    | 31213       |
| 0491-09-8   | Piperitenone             | Cayman    | 25752       |
| 100-09-4    | p-Anisic acid            | MCE       | HY-N1394    |
| 100-66-3    | Anisole                  | Sigma     | 123226      |
| 102518-79-6 | (-)-Huperzine A          | MCE       | HY-W019711  |
| 104-54-1    | Cinnamyl alcohol         | MCE       | HY-Y0078    |
| 104-87-0    | p-Tolualdehyde           | MCE       | HY-W012860  |
| 105-87-3    | Geranyl acetate          | Ambeed    | A404343     |
| 106-22-9    | Citronellol              | MCE       | HY-W010201  |
| 106-22-9    | $\beta$ -Citronellol     | TCI       | C0370       |
| 107-35-7    | Taurine                  | MCE       | HY-B0351    |
| 110-02-1    | Thiophene                | TCI       | T0223       |
| 111-87-5    | 1-octanol                | Sigma     | 297877      |
| 112-14-1    | Octyle acetate           | TCI       | A0042       |
| 112-39-0    | Methyl palmitate         | TCI       | P0006       |
| 116-26-7    | Safranal                 | MCE       | HY-N7560    |
| 1180-71-8   | Limonin                  | MCE       | HY-17411    |
| 119-65-3    | Isoquinoline             | MCE       | HY-W012732  |
| 120-57-0    | Piperonyl alcohol        | Sigma     | P49104      |
| 123-11-5    | p-anisaldehyde           | TCI       | A1674       |
| 123-35-3    | Myrcene                  | Sigma     | M100005     |
| 123-51-3    | Isoamyl alcohol          | Sigma     | W205710     |
| 124-20-9    | Spermidine               | MCE       | HY-B1776    |
| 126-17-0    | Solasodine               | MCE       | HY-N0068    |
| 137-32-6    | 2-Methyl-1-butanol       | Sigma     | 133051      |
| 14371-10-9  | trans-Cinnamaldehyde     | MCE       | HY-W019711  |
| 1490-04-6   | Menthol                  | MCE       | HY-N1369    |
| 150-86-7    | Phytol                   | MCE       | HY-N3075    |
| 16409-43-1  | L-Mimosine               | Apex      | B4751       |
| 168316-95-8 | Spinosad                 | Cayman    | 25649       |
| 18524-94-2  | Loganin                  | MCE       | HY-N0512    |
| 18836-52-7  | Pellitorine              | Cayman    | 11662       |
| 19431-84-6  | Curcumenol               | MCE       | HY-N2259    |
| 20283-92-5  | Rosmarinic acid          | MCE       | HY-N0529    |
| 2068-78-2   | Vincristine (sulfate)    | MCE       | HY-N0488    |
| 2244-16-8   | (+)-Carvone              | Sigma     | 22070       |
| 23180-57-6  | Paeoniflorin             | MCE       | HY-N0293    |
| 23800-56-8  | Pogostone                | MCE       | HY-N1416    |
| 24393-56-4  | Ethyl p-methoxycinnamate | Cayman    | 11740       |
| 24697-74-3  | Leonurine                | MCE       | HY-N0741    |
| 2482-00-0   | Agmatine                 | Chemimpex | 10668       |
| 3387-41-5   | Sabinene                 | MCE       | HY-108943   |
| 357-70-0    | Galanthamine             | MCE       | HY-76299    |
| 3650-09-7   | Carnosic acid            | MCE       | HY-N0644    |
| 372-75-8    | L-Citrulline             | MCE       | HY-N0391    |
| 37839-63-7  | Germacrene D             | Aobious   | CFN93281    |
| 4180-23-8   | trans-Anethole           | MCE       | HY-N0367    |

|             |                                     |           |            |
|-------------|-------------------------------------|-----------|------------|
| 4373-41-5   | Maslinic acid                       | MCE       | HY-N0629   |
| 462-94-2    | Cadaverine                          | Sigma     | 52063      |
| 464-45-9    | (-)-Borneol                         | TCI       | B1012      |
| 4674-50-4   | Nootkatone                          | MCE       | HY-N2195   |
| 469-61-4    | (-)-Cedrene                         | MCE       | HY-135190  |
| 469-83-0    | Cafestol                            | MCE       | HY-N6257   |
| 470-82-6    | Eucalyptol                          | Sigma     | C80601     |
| 474-58-8    | Daucosterol                         | MCE       | HY-N0410   |
| 474-58-8    | Sitogluside                         | Targetmol | T3871      |
| 476-66-4    | Ellagic acid                        | MCE       | HY-B0183   |
| 484-20-8    | Bergapten                           | MCE       | HY-N0370   |
| 489-84-9    | Guaiazulene                         | Cayman    | 31506      |
| 490-79-9    | 2,5-Dihydroxybenzoic acid           | MCE       | HY-W001179 |
| 496-16-2    | Coumaran                            | MCE       | HY-75247   |
| 496-16-2    | 2,3-Dihydrobenzofuran               | TCI       | D1583      |
| 499-75-2    | Carvacrol                           | MCE       | HY-N0711   |
| 508-02-01   | Oleanolic acid                      | MCE       | HY-N0156   |
| 520-18-3    | Kaempferol                          | MCE       | HY-14590   |
| 520-36-5    | Apigenin                            | MCE       | HY-N1201   |
| 522-17-8    | Deguelin                            | MCE       | HY-13425   |
| 532-11-6    | Anethole trithione                  | MCE       | HY-B1223   |
| 536-74-3    | Phenylacetylene                     | Sigma     | 117706     |
| 5451-09-2   | 5-Aminolevulinic acid (hydrochlorid | MCE       | HY-W000450 |
| 55396-45-7  | 2-Nonylquinolin-4(1H)-one           | Cayman    | 9003627    |
| 5784-74-7   | Salsolidine                         | MCE       | HY-22385   |
| 58-08-2     | Caffeine                            | Sigma     | C0750      |
| 5957-80-2   | Carnosol                            | MCE       | HY-N0643   |
| 6080-33-7   | Sinomenine hydrochloride            | MCE       | HY-15122   |
| 628-97-7    | Ethyl palmitate                     | MCE       | HY-N2086   |
| 646-23-1    | Alyssin                             | Cayman    | 31513      |
| 67-68-5     | DMSO                                | VWR       | N182       |
| 68370-47-8  | Micheliolide                        | MCE       | HY-N0847   |
| 689295-71-4 | Salvinorin A propionate             | Cayman    | 22290      |
| 69-72-7     | Salicylic acid                      | MCE       | HY-B0167   |
| 70-26-8     | L-Ornithine                         | MCE       | HY-B1352   |
| 7212-44-4   | Nerolidol                           | MCE       | HY-N1944   |
| 76-22-2     | Camphor                             | MCE       | HY-N0808   |
| 77-52-1     | Ursolic acid                        | MCE       | HY-N0140   |
| 821-55-6    | 2-Nonanone                          | TCI       | N093       |
| 83-34-1     | Skatole                             | MCE       | HY-W007355 |
| 83-79-4     | Rotenone                            | MCE       | HY-B1756   |
| 84-79-7     | Lapachol                            | MCE       | HY-N6961   |
| 87-44-5     | Beta caryophyllene                  | TCI       | C0796      |
| 94-62-2     | Piperine                            | MCE       | HY-N0144   |
| 98-01-1     | Furfural                            | TCI       | F0073      |
| 98-86-2     | Acetophenone                        | MCE       | HY-Y0989   |
| 99-83-2     | $\alpha$ -Phellandrene              | Cayman    | 23179      |
|             | Water                               | NA        | NA         |

Table S2

| Control               | Test compound                         | Mean difference            | Confidence interval         | Mann Whitney U p-value |
|-----------------------|---------------------------------------|----------------------------|-----------------------------|------------------------|
| DMSO                  | Water                                 | 0.418416278                | [-1.042545147,1.888610486]  | 0.592042362            |
|                       | 1-Octanol                             | -7.446257978               | [-8.944624989,-5.916855544] | 1.30E-18               |
|                       | Phytol                                | -6.248916054               | [-7.800289802,-4.622621661] | 1.81E-13               |
|                       | Ellagic acid                          | -3.744018664               | [-5.18446186,-2.379065949]  | 2.05E-06               |
|                       | 2-Nonanone                            | -4.575975728               | [-6.019999506,-3.096992372] | 3.64E-09               |
|                       | Methyl palmitate                      | -1.97842157                | [-3.417955171,-0.56689992]  | 0.011176909            |
|                       | Salvinorin A propionate               | -3.313405029               | [-4.793185297,-1.846933781] | 1.48E-05               |
|                       | Spinosad                              | -2.796940343               | [-4.280255685,-1.379054313] | 0.000335216            |
|                       | Camphor                               | -2.756356203               | [-4.166159325,-1.342275257] | 0.00037079             |
|                       | Oleanolic acid                        | -1.760109057               | [-3.361770937,-0.125458898] | 0.029238986            |
|                       | Ursolic acid                          | -2.229334946               | [-3.737299601,-0.736520599] | 0.003827441            |
|                       | Myrcene                               | -0.922617881               | [-2.505483359,0.619730677]  | 0.243619443            |
|                       | Daucosterol                           | -1.884849721               | [-3.467183476,-0.320818939] | 0.01483401             |
|                       | L-Ornithine                           | -0.609784325               | [-2.11651606,0.830942099]   | 0.417770117            |
|                       | Kaempferol                            | -0.579287489               | [-2.004299975,0.853946956]  | 0.517068043            |
|                       | Rosmarinic acid                       | 0.318119281                | [-1.193405983,1.889967232]  | 0.655166708            |
|                       | p-Anisic acid                         | -1.168227079               | [-2.624243578,0.314359621]  | 0.102973859            |
|                       | Anethole trithione                    | -0.628187066               | [-2.084486214,0.863429497]  | 0.421273964            |
|                       | Beta caryophyllene                    | -0.749597662               | [-2.169116931,0.597222118]  | 0.336496767            |
|                       | Safranal                              | -2.081201824               | [-3.541571505,-0.588646967] | 0.009653988            |
|                       | Germacrene D                          | -0.753979373               | [-2.251626502,0.595483939]  | 0.288046187            |
|                       | Octyl acetate                         | -0.874845283               | [-2.397010008,0.677105957]  | 0.24831137             |
|                       | (-)-Borneol                           | -0.792537819               | [-2.327241987,0.715816505]  | 0.289768953            |
|                       | Deguelin                              | 0.051096502                | [-1.42536854,1.597037821]   | 0.959995518            |
|                       | Pogostone                             | -0.356110792               | [-1.885735862,1.211356112]  | 0.590304829            |
|                       | Ethyl p-methoxycinnamate              | -1.895099326               | [-3.396405015,-0.33526572]  | 0.016880352            |
|                       | Alyssin                               | 0.601231243                | [-0.857387303,2.071460563]  | 0.389438312            |
|                       | Loganin                               | -0.402805743               | [-1.955670203,1.024266222]  | 0.576884371            |
|                       | Curcumenol                            | -0.054530633               | [-1.487670413,1.424354948]  | 0.935457286            |
|                       | Carvacrol                             | -0.649924601               | [-2.090565499,0.800058984]  | 0.396860232            |
|                       | Carnosic acid                         | 0.534468753                | [-1.108930583,2.127333901]  | 0.518567258            |
|                       | Taurine                               | -0.151004221               | [-1.609527977,1.340560546]  | 0.80767432             |
|                       | Galanthamine                          | 0.202838677                | [-1.288153109,1.743719837]  | 0.777593954            |
|                       | 5-Aminolevulinic acid (hydrochloride) | 0.778599504                | [-0.657583984,2.287574261]  | 0.266720213            |
|                       | Bergapten                             | 0.079160237                | [-1.511928178,1.704178838]  | 0.946618088            |
|                       | Salicylic acid                        | 0.081952928                | [-1.32910045,1.516158991]   | 0.864335565            |
|                       | L-Citrulline                          | 0.129147407                | [-1.363462252,1.701378042]  | 0.874610516            |
|                       | Cafestol                              | -0.310340916               | [-1.71866316,1.135138005]   | 0.672554519            |
|                       | Eucalyptol                            | 0.549431326                | [-1.033106077,2.059584809]  | 0.498367462            |
|                       | Micheliolide                          | -0.761731463               | [-2.259123506,0.733448999]  | 0.401519112            |
|                       | trans-Cinnamaldehyde                  | 0.04328992                 | [-1.44423694,1.598072375]   | 0.983551992            |
| Sitogluside           | 0.802471787                           | [-0.786850422,2.277035296] | 0.304468011                 |                        |
| Ajmalicine            | 0.797529093                           | [-0.723691295,2.328729988] | 0.32275086                  |                        |
| Spermidine            | 0.90432228                            | [-0.559492398,2.388650471] | 0.252509278                 |                        |
| Maslinic acid         | 0.791347372                           | [-0.692250529,2.347652777] | 0.334635059                 |                        |
| Vincristine (sulfate) | 0.230353012                           | [-1.496681365,1.953419059] | 0.820665836                 |                        |
| Cadaverine            | 2.055583173                           | [0.420198012,3.664223582]  | 0.011630385                 |                        |
| trans-Anethole        | 0.346309876                           | [-1.116952185,1.850584747] | 0.66957524                  |                        |
| Menthol               | 1.359364875                           | [-0.159459639,2.899087473] | 0.077556519                 |                        |
| Citronellol           | 1.279706027                           | [-0.217127841,2.766426352] | 0.093808662                 |                        |
| Nootkatone            | 0.67134899                            | [-0.795453135,2.106661232] | 0.387299373                 |                        |
| Geranyl acetate       | 1.806713733                           | [0.27525387,3.328700125]   | 0.022524701                 |                        |

|                           |              |                             |             |
|---------------------------|--------------|-----------------------------|-------------|
| Skatole                   | 0.435912182  | [-1.004850549,1.948422647]  | 0.567077323 |
| Lapachol                  | 2.354201667  | [0.8614157,3.925415723]     | 0.002808376 |
| Sabinene                  | 2.165602488  | [0.573782385,3.71357478]    | 0.006682784 |
| Apigenin                  | 1.760852538  | [0.113658149,3.354540106]   | 0.032190151 |
| Pellitorine               | 1.956312876  | [0.431403171,3.552622622]   | 0.01387036  |
| (+)-Carvone               | 1.122388039  | [-0.310118599,2.579854605]  | 0.129017576 |
| Sinomenine hydrochloride  | 2.010176097  | [0.481229883,3.530882287]   | 0.011148832 |
| Ethyl palmitate           | 2.574182617  | [1.055866396,4.110306223]   | 0.001203977 |
| Agmatine                  | 1.41475386   | [-0.229097612,2.992457163]  | 0.080228605 |
| 4-Methoxybenzaldehyde     | 1.651679916  | [0.204569317,3.117115237]   | 0.031034729 |
| Rotenone                  | 1.404786956  | [-0.15274776,2.947616198]   | 0.083104001 |
| Caffeine                  | 1.426727865  | [-0.098004607,2.869460048]  | 0.048375278 |
| Carnosol                  | 2.520538277  | [1.025989531,3.963681585]   | 0.000883082 |
| $\beta$ -Citronellol      | 1.904443778  | [0.469832984,3.344698648]   | 0.010544132 |
| Piperonyl alcohol         | 2.290496548  | [0.900558474,3.673602974]   | 0.001346962 |
| Nerolidol                 | 1.556257122  | [0.111857845,3.041383456]   | 0.038455903 |
| (-)-Cedrene               | 2.002868018  | [0.49378834,3.44570755]     | 0.007881835 |
| Cinnamyl alcohol          | 2.813894876  | [1.287401015,4.296920842]   | 0.000304379 |
| Limonin                   | 2.822768195  | [1.347736995,4.345541428]   | 0.000292214 |
| 2-Nonylquinolin-4(1H)-one | 1.511253313  | [0.051278578,2.932648572]   | 0.04915823  |
| Piperine                  | 1.94921596   | [0.410096121,3.518125685]   | 0.014160031 |
| Anisole                   | 3.016755037  | [1.461034974,4.546414672]   | 0.000106887 |
| Salsolidine               | 1.705880123  | [0.112536175,3.244210727]   | 0.03335028  |
| 2,5-Dihydroxybenzoic acid | 2.462994562  | [0.975837794,3.874346623]   | 0.000918221 |
| Furfural                  | 3.619145748  | [2.048320479,5.138182539]   | 5.89E-06    |
| Solasodine                | 3.820701479  | [2.257311864,5.414398581]   | 1.25E-06    |
| p-Tolualdehyde            | 2.405530766  | [0.921225111,3.838737379]   | 0.001514636 |
| Piperitenone              | 2.706710601  | [1.319182446,4.159756165]   | 0.000286615 |
| (-)-Huperzine A           | 3.377967333  | [1.869578377,4.772487763]   | 6.21E-06    |
| Isoquinoline              | 3.80747455   | [2.368154777,5.357931461]   | 1.48E-06    |
| Guaiazulene               | 4.30454246   | [2.961119111,5.685223912]   | 7.07E-09    |
| Leonurine                 | 4.53372164   | [3.003013201,6.076815541]   | 1.78E-08    |
| L-Mimosine                | 4.282030722  | [2.806166601,5.730662963]   | 1.28E-08    |
| Acetophenone              | 5.238403391  | [3.64883975,6.775884259]    | 1.16E-10    |
| Paeoniflorin              | 5.3815952    | [3.586878963,7.050418163]   | 1.68E-09    |
| Phenylacetylene           | 6.450087269  | [4.656452494,8.165053654]   | 3.34E-12    |
| $\alpha$ -Phellandrene    | 5.367571203  | [3.800867737,6.835874141]   | 1.83E-11    |
| Coumaran                  | 4.930434545  | [3.386463535,6.361231682]   | 4.56E-10    |
| 2,3-Dihydrobenzofuran     | 9.19446721   | [7.629788972,10.67393717]   | 1.17E-28    |
| Diacetyl                  | 8.018781008  | [6.589946155,9.361027152]   | 1.69E-24    |
| Thiophene                 | 9.759898437  | [8.202216508,11.26330001]   | 3.00E-32    |
| 2-Methyl-1-butanol        | 11.71224688  | [9.891177903,13.40946161]   | 1.45E-30    |
| Isoamyl alcohol           | 14.1669992   | [12.82040715,15.51179618]   | 1.86E-53    |
| DMSO                      | -0.418416278 | [-1.835136484,1.079114017]  | 0.592042362 |
| (+)-Carvone               | 0.703971761  | [-0.733226061,2.151434156]  | 0.357394202 |
| (-)-Borneol               | -1.210954097 | [-2.782015361,0.362023041]  | 0.137469796 |
| (-)-Cedrene               | 1.58445174   | [-0.021242184,3.080055954]  | 0.035556162 |
| (-)-Huperzine A           | 2.959551055  | [1.392194716,4.435205587]   | 0.000230917 |
| 1-Octanol                 | -7.864674256 | [-9.412386223,-6.307701331] | 4.28E-20    |
| 2,3-Dihydrobenzofuran     | 8.776050932  | [7.137826729,10.35558089]   | 1.59E-25    |
| 2,5-Dihydroxybenzoic acid | 2.044578284  | [0.513804136,3.517038624]   | 0.008738044 |
| 2-Methyl-1-butanol        | 11.2938306   | [9.482638434,13.03874681]   | 2.08E-28    |
| 2-Nonylquinolin-4(1H)-one | 1.092837035  | [-0.502448664,2.622476669]  | 0.190562544 |

Water

|                                       |              |                             |             |
|---------------------------------------|--------------|-----------------------------|-------------|
| 2-Nonanone                            | -4.994392006 | [-6.570856299,-3.472581793] | 3.67E-10    |
| 4-Methoxybenzaldehyde                 | 1.233263638  | [-0.366831814,2.725731245]  | 0.122397804 |
| 5-Aminolevulinic acid (hydrochloride) | 0.360183226  | [-1.164149193,1.882576727]  | 0.737982203 |
| Acetophenone                          | 4.819987113  | [3.17966903,6.422917263]    | 4.27E-09    |
| Agmatine                              | 0.996337582  | [-0.630466937,2.590929684]  | 0.231236906 |
| Ajmalicine                            | 0.379112816  | [-1.246486943,1.946928346]  | 0.627417249 |
| Alyssin                               | 0.182814965  | [-1.3547369,1.6928634]      | 0.854755654 |
| Anethole trithione                    | -1.046603344 | [-2.616136597,0.412123361]  | 0.178323416 |
| Anisole                               | 2.59833876   | [0.981452205,4.142117853]   | 0.001176104 |
| Apigenin                              | 1.34243626   | [-0.303722783,3.018160127]  | 0.105687265 |
| Bergapten                             | -0.339256041 | [-2.005360836,1.309621179]  | 0.697656028 |
| Beta caryophyllene                    | -1.168013939 | [-2.683462807,0.244212287]  | 0.113215791 |
| Cadaverine                            | 1.637166896  | [-0.067742493,3.251625347]  | 0.040824707 |
| Cafestol                              | -0.728757194 | [-2.238294377,0.678842262]  | 0.333146643 |
| Caffeine                              | 1.008311587  | [-0.528377668,2.520874313]  | 0.239951032 |
| Camphor                               | -3.174772481 | [-4.717199968,-1.695793368] | 3.52E-05    |
| Carnosic acid                         | 0.116052475  | [-1.502566042,1.752304989]  | 0.858733198 |
| Carnosol                              | 2.102121999  | [0.484796886,3.6110893]     | 0.006448328 |
| Carvacrol                             | -1.068340878 | [-2.638498574,0.429584059]  | 0.160696882 |
| Cinnamyl Alcohol                      | 2.395478598  | [0.771147456,3.941065248]   | 0.002907537 |
| Citronellol                           | 0.861289749  | [-0.705227079,2.390776455]  | 0.323105237 |
| Coumaran                              | 4.512018267  | [2.941810959,6.023829739]   | 8.11E-08    |
| Curcumenol                            | -0.472946911 | [-1.981440184,1.021518818]  | 0.555813714 |
| Daucosterol                           | -2.303265999 | [-3.944838192,-0.634710061] | 0.005208431 |
| Deguelin                              | -0.367319776 | [-1.870388366,1.199140003]  | 0.641662642 |
| Diacetyl                              | 7.60036473   | [6.17145216,9.054839434]    | 2.10E-20    |
| Ellagic acid                          | -4.162434942 | [-5.656421214,-2.78643136]  | 1.16E-07    |
| Ethyl p-methoxycinnamate              | -2.313515604 | [-3.919314029,-0.6996897]   | 0.004709328 |
| Ethyl palmitate                       | 2.15576634   | [0.53100742,3.781639841]    | 0.006083734 |
| Eucalyptol                            | 0.131015048  | [-1.520329506,1.71099846]   | 0.845441719 |
| Furfural                              | 3.20072947   | [1.559980398,4.793336684]   | 7.92E-05    |
| Galanthamine                          | -0.215577601 | [-1.769487981,1.33645995]   | 0.815431333 |
| Geranyl acetate                       | 1.388297455  | [-0.256819233,2.947647621]  | 0.072939702 |
| Germacrene D                          | -1.172395651 | [-2.614035569,0.271744605]  | 0.112464071 |
| Guaiazulene                           | 3.886126182  | [2.421578903,5.379327942]   | 6.86E-07    |
| Isoamyl alcohol                       | 13.74858293  | [12.34221449,15.15245973]   | 2.80E-49    |
| Isoquinoline                          | 3.389058273  | [1.759954375,4.888120351]   | 2.55E-05    |
| Kaempferol                            | -0.997703767 | [-2.49341812,0.486428472]   | 0.169078555 |
| L-Citrulline                          | -0.28926887  | [-1.88185401,1.252387401]   | 0.732004398 |
| L-Ornithine                           | -1.028200603 | [-2.635649528,0.465434394]  | 0.189633762 |
| Lapachol                              | 1.935785389  | [0.308260903,3.582061614]   | 0.016998597 |
| Leonurine                             | 4.115305362  | [2.43646737,5.681880021]    | 5.83E-07    |
| Limonin                               | 2.404351917  | [0.846680822,3.963538616]   | 0.002215553 |
| Loganin                               | -0.821222021 | [-2.410466516,0.683743609]  | 0.294624083 |
| Maslinic acid                         | 0.372931094  | [-1.208115676,1.963288845]  | 0.611068978 |
| Menthol                               | 0.940948597  | [-0.662454322,2.471186272]  | 0.217898177 |
| Methyl palmitate                      | -2.396837848 | [-3.896363909,-0.889997563] | 0.001750989 |
| Micheliolide                          | -1.18014774  | [-2.724442999,0.363556854]  | 0.13310344  |
| Myrcene                               | -1.341034158 | [-2.950253279,0.272036677]  | 0.107107622 |
| Nerolidol                             | 1.137840844  | [-0.412859074,2.689400622]  | 0.195349431 |
| Nootkatone                            | 0.252932713  | [-1.310177211,1.694852759]  | 0.762674364 |
| Octyl acetate                         | -1.29326156  | [-2.993531957,0.254852769]  | 0.115069968 |
| Oleanolic acid                        | -2.178525335 | [-3.833409139,-0.58398499]  | 0.009304858 |

|                          |              |                             |             |
|--------------------------|--------------|-----------------------------|-------------|
| Paeoniflorin             | 4.963178922  | [3.15919028,6.76913341]     | 3.41E-08    |
| Pellitorine              | 1.537896598  | [-0.210729863,3.090954806]  | 0.050326026 |
| Phenylacetylene          | 6.031670991  | [4.135724936,7.733911823]   | 1.22E-10    |
| Phytol                   | -6.667332332 | [-8.326054672,-4.998784587] | 2.35E-14    |
| Piperine                 | 1.530799682  | [-0.103703807,3.112460974]  | 0.06738667  |
| Piperitenone             | 2.288294323  | [0.790745159,3.826609472]   | 0.003573336 |
| Piperonyl alcohol        | 1.87208027   | [0.430105372,3.296846649]   | 0.020099403 |
| Pogostone                | -0.77452707  | [-2.391370404,0.809353242]  | 0.353969141 |
| L-Mimosine               | 3.863614444  | [2.354364565,5.385342817]   | 9.97E-07    |
| Rosmarinic acid          | -0.100296997 | [-1.653786744,1.484949298]  | 0.881609924 |
| Rotenone                 | 0.986370678  | [-0.653782901,2.511506066]  | 0.201878109 |
| Sabinene                 | 1.747186211  | [0.129212726,3.390449708]   | 0.027757551 |
| Safranal                 | -2.499618102 | [-4.010133163,-1.003454238] | 0.001404337 |
| Salicylic acid           | -0.33646335  | [-1.861453563,1.086996591]  | 0.653036    |
| Salsolidine              | 1.287463845  | [-0.363905509,2.899490236]  | 0.119464695 |
| Salvinorin A propionate  | -3.731821307 | [-5.300716829,-2.233020879] | 1.96E-06    |
| Sinomenine hydrochloride | 1.59175982   | [0.016256216,3.155502077]   | 0.040254455 |
| Sitogluside              | 0.384055509  | [-1.175186766,1.946897162]  | 0.585684937 |
| Skatole                  | 0.017495904  | [-1.500906059,1.571866512]  | 0.999462905 |
| Solasodine               | 3.402285202  | [1.84336128,4.983593772]    | 2.52E-05    |
| Spermidine               | 0.485906002  | [-1.045914054,2.016203189]  | 0.513866555 |
| Spinosad                 | -3.215356621 | [-4.791870389,-1.771035434] | 4.52E-05    |
| Taurine                  | -0.569420499 | [-2.094577265,1.017188236]  | 0.471176139 |
| Thiophene                | 9.341482159  | [7.722647176,10.90297703]   | 7.84E-29    |
| trans-Anethole           | -0.072106401 | [-1.680317183,1.456152155]  | 0.929109595 |
| Ursolic acid             | -2.647751224 | [-4.195196933,-1.069678223] | 0.000849888 |
| Vincristine (sulfate)    | -0.188063266 | [-1.962606275,1.556400592]  | 0.858483857 |
| p-Anisic acid            | -1.586643357 | [-3.142784472,-0.05209836]  | 0.0386932   |
| p-Tolualdehyde           | 1.987114488  | [0.397433073,3.48339038]    | 0.014542514 |
| trans-Cinnamaldehyde     | -0.375126358 | [-1.989382439,1.223274719]  | 0.649316393 |
| $\alpha$ -Phellandrene   | 4.949154925  | [3.271456174,6.519792509]   | 1.58E-09    |
| $\beta$ -Citronellol     | 1.4860275    | [-0.115474133,2.990822025]  | 0.076716886 |



Table S3

| Strain                   | Test compound             | Mean difference            | Confidence interval         | Mann Whitney U p-value |
|--------------------------|---------------------------|----------------------------|-----------------------------|------------------------|
| PR678                    | (-)-Huperzine A           | 2.506551933                | [1.196282289,3.777346115]   | 0.00035051             |
|                          | 1-Octanol                 | -3.953031853               | [-5.293354437,-2.707068911] | 4.77E-09               |
|                          | 2,3-Dihydrobenzofuran     | 6.791055704                | [5.381876043,8.232949225]   | 5.06E-19               |
|                          | 2,5-Dihydroxybenzoic acid | 1.256955084                | [0.014838711,2.370033206]   | 0.072375578            |
|                          | 2-Methyl-1-butanol        | 1.72263115                 | [0.32462248,3.058873521]    | 0.023761763            |
|                          | 2-Nonanone                | -6.325735345               | [-7.514221127,-5.133704143] | 9.34E-23               |
|                          | Acetophenone              | -4.155159251               | [-5.440197855,-2.909974522] | 9.51E-10               |
|                          | Anisole                   | 6.443393888                | [5.207383487,7.700429771]   | 3.13E-24               |
|                          | Camphor                   | 1.511301065                | [0.137512631,2.830649699]   | 0.039886864            |
|                          | Carnosol                  | 6.715551359                | [5.222533101,8.150083245]   | 4.87E-18               |
|                          | Cinnamyl alcohol          | 4.82360499                 | [3.421628478,6.116566569]   | 1.11E-11               |
|                          | Coumaran                  | 4.436577383                | [3.143471053,5.693204899]   | 9.29E-10               |
|                          | Daucosterol               | 4.35357388                 | [3.020384631,5.659565357]   | 5.39E-09               |
|                          | Diacetyl                  | 12.02367483                | [10.76427953,13.22245247]   | 1.08E-65               |
|                          | Ellagic acid              | 3.740324355                | [2.417303374,5.033939265]   | 3.00E-07               |
|                          | Ethyl p-methoxycinnamate  | 0.164256956                | [-1.115178079,1.434780591]  | 0.444930185            |
|                          | Ethyl palmitate           | 2.072550389                | [0.764345298,3.349728618]   | 0.001838431            |
|                          | Furfural                  | -1.759838584               | [-3.071464973,-0.421772955] | 0.013168579            |
|                          | Guaiazulene               | 1.398678841                | [0.0526089,2.773949115]     | 0.057116657            |
|                          | Water                     | 3.815697313                | [2.391063401,5.15643314]    | 1.03E-06               |
|                          | Isoamyl alcohol           | 3.360917079                | [2.08940929,4.599194659]    | 5.69E-07               |
|                          | Isoquinoline              | 1.289957846                | [0.011965958,2.510181684]   | 0.012349521            |
|                          | L-Mimosine                | 1.955263688                | [0.724586254,3.120777848]   | 0.001535245            |
|                          | Lapachol                  | 3.358746216                | [2.045634538,4.712824518]   | 5.47E-06               |
|                          | Leonurine                 | 3.116671618                | [1.724720109,4.466457238]   | 2.90E-05               |
|                          | Limonin                   | 2.04380555                 | [0.741181106,3.283126542]   | 0.004402944            |
|                          | Methyl palmitate          | 3.057650027                | [1.88773175,4.281578337]    | 1.58E-06               |
|                          | Oleanolic acid            | 5.089929434                | [3.59125624,6.546145461]    | 7.54E-12               |
|                          | Paeoniflorin              | 2.591908629                | [1.236147744,3.957242079]   | 0.000578629            |
|                          | Phenylacetylene           | 3.33225168                 | [2.119476825,4.579112325]   | 3.61E-07               |
|                          | Phytol                    | 4.161897239                | [2.887164251,5.405228143]   | 2.47E-09               |
|                          | Piperitenone              | 5.808303157                | [4.469323305,7.081253481]   | 5.83E-17               |
|                          | Piperonyl alcohol         | 2.854725309                | [1.459537497,4.163657663]   | 2.93E-05               |
| Sabinene                 | 3.510175996               | [2.242070102,4.765905963]  | 3.77E-08                    |                        |
| Salvinorin A propionate  | 2.694564208               | [1.400976541,3.977000101]  | 6.24E-05                    |                        |
| Sinomenine hydrochloride | 3.461593236               | [2.182602941,4.745169661]  | 1.10E-07                    |                        |
| Solasodine               | 4.739235313               | [3.415963486,5.96956053]   | 4.14E-12                    |                        |
| Spinosad                 | 2.191086382               | [0.972782784,3.418358787]  | 0.000746168                 |                        |
| Thiophene                | 2.924811858               | [1.572010434,4.242355712]  | 0.000147653                 |                        |
| Ursolic acid             | 3.597071602               | [2.162683465,4.993891726]  | 5.62E-07                    |                        |
| p-Tolualdehyde           | -0.58339928               | [-1.815140135,0.656114136] | 0.442654907                 |                        |
| $\alpha$ -Phellandrene   | 2.643191178               | [1.415741891,3.874930317]  | 1.17E-05                    |                        |
|                          | (-)-Huperzine A           | 0.282732955                | [-1.201573798,1.854001875]  | 0.736139607            |
|                          | 1-Octanol                 | -1.173354908               | [-2.655424872,0.347435872]  | 0.239627798            |
|                          | 2,3-Dihydrobenzofuran     | 9.735850557                | [8.303091103,11.15447455]   | 2.26E-33               |
|                          | 2,5-Dihydroxybenzoic acid | -1.519681712               | [-2.999780583,0.088079748]  | 0.066967983            |
|                          | 2-Methyl-1-butanol        | 10.78404757                | [9.256073906,12.36254843]   | 1.41E-32               |
|                          | 2-Nonanone                | -3.744639672               | [-5.228812553,-2.15992198]  | 2.99E-06               |

|                           |                          |                             |                             |             |
|---------------------------|--------------------------|-----------------------------|-----------------------------|-------------|
| CX10                      | Acetophenone             | 1.138951085                 | [-0.364586298,2.593818297]  | 0.12897174  |
|                           | Anisole                  | 4.98697076                  | [3.459143437,6.676717667]   | 1.83E-09    |
|                           | Camphor                  | 1.567912782                 | [0.082777616,3.055269671]   | 0.037247798 |
|                           | Carnosol                 | 1.664123031                 | [0.192776097,3.203635924]   | 0.028189968 |
|                           | Cinnamyl alcohol         | 1.396141834                 | [-0.085179917,2.901543738]  | 0.067076594 |
|                           | Coumaran                 | 2.800529153                 | [1.304368073,4.345816835]   | 0.000329387 |
|                           | Daucosterol              | 0.195527237                 | [-1.364387089,1.754244394]  | 0.843486639 |
|                           | Diacyl                   | 3.997838205                 | [2.467943488,5.489077241]   | 5.36E-07    |
|                           | Ellagic acid             | 0.994367768                 | [-0.526177639,2.439284411]  | 0.184930172 |
|                           | Ethyl p-methoxycinnamate | 0.881640839                 | [-0.537618448,2.276164811]  | 0.13331182  |
|                           | Ethyl palmitate          | 0.387870312                 | [-1.189607659,1.95153621]   | 0.605230067 |
|                           | Furfural                 | 3.521593528                 | [1.919599341,5.089823178]   | 1.93E-05    |
|                           | Guaiazulene              | -2.027255188                | [-3.497092947,-0.52540994]  | 0.022953156 |
|                           | Water                    | 2.071253981                 | [0.553971735,3.540890763]   | 0.005258723 |
|                           | Isoamyl alcohol          | 11.38733958                 | [9.915605625,12.88232549]   | 1.35E-41    |
|                           | Isoquinoline             | 1.710296517                 | [0.222849692,3.174817851]   | 0.025232643 |
|                           | L-Mimosine               | 0.684485076                 | [-0.811796073,2.196594717]  | 0.341456997 |
|                           | Lapachol                 | 0.360123179                 | [-1.049034611,1.817354348]  | 0.622411672 |
|                           | Leonurine                | -0.263338887                | [-1.725527483,1.198847601]  | 0.783178147 |
|                           | Limonin                  | 2.249244518                 | [0.791951683,3.709230824]   | 0.002245739 |
|                           | Methyl palmitate         | 1.586704694                 | [0.087465907,3.158557864]   | 0.040693238 |
|                           | Oleanolic acid           | -1.868224549                | [-3.370667567,-0.367964728] | 0.023033632 |
|                           | Paeoniflorin             | 4.4982504                   | [2.975751917,6.030897079]   | 1.46E-08    |
|                           | Phenylacetylene          | 5.656271524                 | [4.10831408,7.252141544]    | 8.10E-12    |
|                           | Phytol                   | 0.504944095                 | [-1.089223562,2.096091255]  | 0.492094568 |
|                           | Piperitenone             | 4.663066824                 | [3.171153336,6.127172417]   | 2.10E-09    |
|                           | Piperonyl alcohol        | -4.271528374                | [-5.743544066,-2.765687105] | 3.40E-08    |
|                           | Sabinene                 | 1.900326761                 | [0.34528558,3.412563277]    | 0.013532242 |
|                           | Salvinorin A propionate  | -0.628809147                | [-2.084150313,0.999858547]  | 0.415811798 |
|                           | Sinomenine hydrochloride | -1.036943141                | [-2.516433013,0.471335284]  | 0.163016611 |
|                           | Solasodine               | -0.543017515                | [-2.038653918,0.90813077]   | 0.436638006 |
|                           | Spinosad                 | 0.99345428                  | [-0.553379795,2.535617456]  | 0.201290392 |
|                           | Thiophene                | 1.565215415                 | [-0.021658985,3.11936696]   | 0.039513796 |
|                           | Ursolic acid             | 0.112112658                 | [-1.383899272,1.614708998]  | 0.7143624   |
| p-Tolualdehyde            | 2.369157267              | [0.879750691,3.944596469]   | 0.002273286                 |             |
| α-Phellandrene            | 2.300012049              | [0.834869996,3.801487582]   | 0.001563959                 |             |
| (-)-Huperzine A           | -0.434662018             | [-1.590813049,0.675229429]  | 0.732890933                 |             |
| 1-Octanol                 | -0.04067736              | [-0.936400174,0.852508083]  | 0.392429771                 |             |
| 2,3-Dihydrobenzofuran     | -1.424592856             | [-2.399113388,-0.482384704] | 0.010269581                 |             |
| 2,5-Dihydroxybenzoic acid | -0.757694318             | [-1.628896134,0.08148564]   | 0.124177306                 |             |
| 2-Methyl-1-butanol        | -2.090040088             | [-3.444071771,-0.752075997] | 7.04E-05                    |             |
| 2-Nonanone                | -2.109201004             | [-3.043781845,-1.216971535] | 1.97E-06                    |             |
| Acetophenone              | -2.662676857             | [-3.555825253,-1.767021688] | 5.51E-10                    |             |
| Anisole                   | -0.644142654             | [-1.66469577,0.350209338]   | 0.160056997                 |             |
| Camphor                   | -0.214094414             | [-1.215805364,0.732331532]  | 0.851575143                 |             |
| Carnosol                  | -0.378642099             | [-1.344392733,0.545564004]  | 0.042170032                 |             |
| Cinnamyl alcohol          | -0.528601199             | [-1.719384261,0.684969144]  | 0.215673856                 |             |
| Coumaran                  | -1.10640694              | [-2.007294658,-0.226486945] | 0.010352538                 |             |
| Daucosterol               | 1.866609146              | [0.796808082,2.99570385]    | 0.063196693                 |             |

|                        |                          |                             |                             |             |
|------------------------|--------------------------|-----------------------------|-----------------------------|-------------|
| GN1077                 | Diacetyl                 | -0.553236954                | [-1.416742938,0.350800548]  | 0.146505313 |
|                        | Ellagic acid             | -0.998580324                | [-1.884730868,-0.117073321] | 0.005504509 |
|                        | Ethyl p-methoxycinnamate | 0.348096803                 | [-0.571141586,1.247610329]  | 0.820414539 |
|                        | Ethyl palmitate          | -1.320907822                | [-2.298959444,-0.360611839] | 0.001189529 |
|                        | Furfural                 | -1.739810035                | [-2.628346679,-0.835283291] | 2.78E-05    |
|                        | Guaiazulene              | -0.760597351                | [-1.726100808,0.256319012]  | 0.045080376 |
|                        | Water                    | -1.167212741                | [-2.059520873,-0.276624734] | 0.005579722 |
|                        | Isoamyl alcohol          | -1.151320433                | [-2.042584601,-0.250902813] | 0.011031534 |
|                        | Isoquinoline             | -1.789341961                | [-2.652139545,-0.942829424] | 1.68E-05    |
|                        | L-Mimosine               | 0.141006447                 | [-0.777214478,1.025659206]  | 0.813792259 |
|                        | Lapachol                 | -1.912120772                | [-2.953998485,-0.914305702] | 2.31E-05    |
|                        | Leonurine                | -0.247555982                | [-1.238923169,0.690922303]  | 0.83508645  |
|                        | Limonin                  | -0.283288466                | [-1.295399415,0.713165547]  | 0.017058152 |
|                        | Methyl palmitate         | -1.243510113                | [-2.159686154,-0.293594559] | 0.000911656 |
|                        | Oleanolic acid           | -0.55840157                 | [-1.557473438,0.441671984]  | 0.015440029 |
|                        | Paeoniflorin             | -1.206682095                | [-2.324824193,-0.13996529]  | 0.004018215 |
|                        | Phenylacetylene          | -1.360182606                | [-2.339750641,-0.330590092] | 0.006834045 |
|                        | Phytol                   | -1.792943441                | [-2.723311763,-0.880464218] | 6.37E-06    |
|                        | Piperitenone             | -0.640886948                | [-1.638411373,0.327774445]  | 0.286790326 |
|                        | Piperonyl alcohol        | -1.812025817                | [-2.737049153,-0.910469945] | 4.47E-05    |
|                        | Sabinene                 | -1.017890637                | [-2.019532604,0.005831311]  | 0.037933093 |
|                        | Salvinorin A propionate  | -1.218230057                | [-2.162830926,-0.302902831] | 0.000210468 |
|                        | Sinomenine hydrochloride | -1.687787231                | [-2.576306287,-0.775016384] | 4.18E-05    |
|                        | Solasodine               | 1.259419637                 | [0.213855649,2.33599256]    | 0.372838469 |
|                        | Spinosad                 | 0.920550843                 | [-0.017271411,1.927572805]  | 0.255270719 |
|                        | Thiophene                | -1.322189579                | [-2.200843847,-0.447771758] | 0.006999413 |
|                        | Ursolic acid             | -1.520890129                | [-2.450459631,-0.639029764] | 2.36E-05    |
| p-Tolualdehyde         | -0.26158427              | [-1.151013142,0.663353305]  | 0.286960323                 |             |
| $\alpha$ -Phellandrene | -1.07830851              | [-2.011872877,-0.175648616] | 0.009207404                 |             |
|                        | Water                    | 0.418416278                 | [-1.042545147,1.888610486]  | 0.592042362 |
|                        | 1-Octanol                | -7.446257978                | [-8.944624989,-5.916855544] | 1.30E-18    |
|                        | Phytol                   | -6.248916054                | [-7.800289802,-4.622621661] | 1.81E-13    |
|                        | Ellagic acid             | -3.744018664                | [-5.18446186,-2.379065949]  | 0.00000205  |
|                        | 2-Nonanone               | -4.575975728                | [-6.019999506,-3.096992372] | 3.64E-09    |
|                        | Methyl palmitate         | -1.97842157                 | [-3.417955171,-0.56689992]  | 0.011176909 |
|                        | Salvinorin A propionate  | -3.313405029                | [-4.793185297,-1.846933781] | 0.0000148   |
|                        | Spinosad                 | -2.796940343                | [-4.280255685,-1.379054313] | 0.000335216 |
|                        | Camphor                  | -2.756356203                | [-4.166159325,-1.342275257] | 0.00037079  |
|                        | Oleanolic acid           | -1.760109057                | [-3.361770937,-0.125458898] | 0.029238986 |
|                        | Ursolic acid             | -2.229334946                | [-3.737299601,-0.736520599] | 0.003827441 |
|                        | Daucosterol              | -1.884849721                | [-3.467183476,-0.320818939] | 0.01483401  |
|                        | Ethyl p-methoxycinnamate | -1.895099326                | [-3.396405015,-0.33526572]  | 0.016880352 |
|                        | Lapachol                 | 2.354201667                 | [0.8614157,3.925415723]     | 0.002808376 |
|                        | Sabinene                 | 2.165602488                 | [0.573782385,3.71357478]    | 0.006682784 |
|                        | Sinomenine hydrochloride | 2.010176097                 | [0.481229883,3.530882287]   | 0.011148832 |
|                        | Ethyl palmitate          | 2.574182617                 | [1.055866396,4.110306223]   | 0.001203977 |
|                        | Carnosol                 | 2.520538277                 | [1.025989531,3.963681585]   | 0.000883082 |
|                        | Piperonyl alcohol        | 2.290496548                 | [0.900558474,3.673602974]   | 0.001346962 |
|                        | Cinnamyl alcohol         | 2.813894876                 | [1.287401015,4.296920842]   | 0.000304379 |

|                    |                           |                           |                           |             |
|--------------------|---------------------------|---------------------------|---------------------------|-------------|
| N2                 | Limonin                   | 2.822768195               | [1.347736995,4.345541428] | 0.000292214 |
|                    | Anisole                   | 3.016755037               | [1.461034974,4.546414672] | 0.000106887 |
|                    | 2,5-Dihydroxybenzoic acid | 2.462994562               | [0.975837794,3.874346623] | 0.000918221 |
|                    | Furfural                  | 3.619145748               | [2.048320479,5.138182539] | 0.00000589  |
|                    | Solasodine                | 3.820701479               | [2.257311864,5.414398581] | 0.00000125  |
|                    | p-Tolualdehyde            | 2.405530766               | [0.921225111,3.838737379] | 0.001514636 |
|                    | Piperitenone              | 2.706710601               | [1.319182446,4.159756165] | 0.000286615 |
|                    | (-)-Huperzine A           | 3.377967333               | [1.869578377,4.772487763] | 0.00000621  |
|                    | Isoquinoline              | 3.80747455                | [2.368154777,5.357931461] | 0.00000148  |
|                    | Guaiazulene               | 4.30454246                | [2.961119111,5.685223912] | 7.07E-09    |
|                    | Leonurine                 | 4.53372164                | [3.003013201,6.076815541] | 1.78E-08    |
|                    | L-Mimosine                | 4.282030722               | [2.806166601,5.730662963] | 1.28E-08    |
|                    | Acetophenone              | 5.238403391               | [3.64883975,6.775884259]  | 1.16E-10    |
|                    | Paeoniflorin              | 5.3815952                 | [3.586878963,7.050418163] | 1.68E-09    |
|                    | Phenylacetylene           | 6.450087269               | [4.656452494,8.165053654] | 3.34E-12    |
|                    | $\alpha$ -Phellandrene    | 5.367571203               | [3.800867737,6.835874141] | 1.83E-11    |
|                    | Coumaran                  | 4.930434545               | [3.386463535,6.361231682] | 4.56E-10    |
|                    | 2,3-Dihydrobenzofuran     | 9.19446721                | [7.629788972,10.67393717] | 1.17E-28    |
|                    | Diacetyl                  | 8.018781008               | [6.589946155,9.361027152] | 1.69E-24    |
|                    | Thiophene                 | 9.759898437               | [8.202216508,11.26330001] | 3.00E-32    |
| 2-Methyl-1-butanol | 11.71224688               | [9.891177903,13.40946161] | 1.45E-30                  |             |
| Isoamyl alcohol    | 14.1669992                | [12.82040715,15.51179618] | 1.86E-53                  |             |
